# Supplementary material for: Exploring the PXR ligand binding mechanism with advanced Molecular Dynamics methods
Source: PubMed Central journal article supplement (PMC6212460; doi:10.1038/s41598-018-34373-z), 2018-11-01
Supplement: 41598_2018_34373_MOESM1_ESM.pdf [file 41598_2018_34373_MOESM1_ESM.pdf]

# Exploring the PXR ligand binding mechanism with advanced Molecular Dynamics methods

Stefano Motta, Lara Callea, Sara Giani Tagliabue, Laura Bonati\*

Table S1: Experimental structures for the PXR LBD in complex with SR12813 available in the PDB.

| <b>PDB ID</b> | <b>resolution<br/>[Å]</b> | <b>co-crystallized<br/>partner</b> | <b>ref</b> | <b>residues within 4 Å of SR12813</b>                                                                                                                                                                                                                                      |
|---------------|---------------------------|------------------------------------|------------|----------------------------------------------------------------------------------------------------------------------------------------------------------------------------------------------------------------------------------------------------------------------------|
| 1ILH          | 2.8                       | none                               | 12         | <b>1ILH.a</b> S208, V211, M243, M246, S247, F251, F281, C284, Q285, F288, W299, L411<br><b>1ILH.b</b> E205, L206, L209, L240, S247, F288, W299, M323, L324, H407, R410, L411, F420<br><b>1ILH.c</b> L209, M243, A244, S247, F251, F281, C284, Q285, F288, M323, H407, R410 |
| 1NRL          | 2.0                       | SRC-1                              | 20         | L209, M243, A244, M246, S247, F251, F281, Q285, F288, W299, Y306, M323, H407, L411, F429                                                                                                                                                                                   |
| 3HVL          | 2.1                       | SRC-1                              | 21         | L209, M243, A244, M246, S247, F251, F281, Q285, F288, W299, Y306, M323, L324, H327, H407, L411, I414, F420, M425, F429                                                                                                                                                     |
| 4J5X          | 2.8                       | SRC-1 and RXR                      | 8          | L206, L209, L240, M243, M246, S247, Q285, F288, W299, Y306, M323, H327, H407, R410, L411, I414, M425                                                                                                                                                                       |

Table S2: dRMSD from the X-ray structures calculated on the last frames of the MD-binding simulations.

| <b>dRMSD (Å) Entrance A</b> |               |               |               |             |             |
|-----------------------------|---------------|---------------|---------------|-------------|-------------|
| <b>Rep</b>                  | <b>1ILH.a</b> | <b>1ILH.b</b> | <b>1ILH.c</b> | <b>1NRL</b> | <b>4J5X</b> |
| A26                         | 9.70          | 6.57          | 8.35          | 7.01        | 8.52        |
| A30                         | 7.04          | 5.85          | 5.44          | 6.23        | 4.97        |
| A39                         | 7.89          | 6.92          | 5.61          | 7.21        | 5.78        |
| A40                         | 4.62          | 3.46          | 5.13          | 3.74        | 4.57        |
| A46                         | 4.00          | 5.17          | 4.74          | 5.22        | 2.78        |
| A47                         | 5.32          | 4.83          | 5.53          | 5.48        | 4.58        |
| A48                         | 5.88          | 5.41          | 5.35          | 6.01        | 4.37        |
| A50                         | 5.18          | 5.54          | 5.69          | 5.29        | 4.90        |
| <b>dRMSD (Å) Entrance B</b> |               |               |               |             |             |
| <b>Rep</b>                  | <b>1ILH.a</b> | <b>1ILH.b</b> | <b>1ILH.c</b> | <b>1NRL</b> | <b>4J5X</b> |
| B1                          | 4.72          | 4.15          | 5.18          | 4.55        | 4.95        |
| B2                          | 5.40          | 2.25          | 5.52          | 3.64        | 6.14        |
| B4                          | 8.45          | 4.68          | 5.31          | 5.35        | 6.64        |
| B5                          | 8.96          | 4.50          | 5.80          | 5.35        | 7.65        |
| B6                          | 5.88          | 3.15          | 2.56          | 3.93        | 4.79        |
| B7                          | 10.50         | 5.82          | 6.59          | 6.98        | 8.45        |
| B9                          | 9.70          | 6.73          | 5.74          | 8.48        | 7.42        |
| B10                         | 5.76          | 4.27          | 2.49          | 4.79        | 3.42        |
| B11                         | 5.63          | 3.72          | 5.74          | 4.75        | 5.48        |

|     |      |      |      |      |      |
|-----|------|------|------|------|------|
| B12 | 8.81 | 4.77 | 5.64 | 5.79 | 7.44 |
| B14 | 8.86 | 4.85 | 5.70 | 5.71 | 7.57 |
| B15 | 6.22 | 3.24 | 4.24 | 3.43 | 5.99 |
| B16 | 4.70 | 4.44 | 4.58 | 4.81 | 4.01 |
| B17 | 7.77 | 4.48 | 3.80 | 6.09 | 5.67 |
| B18 | 2.51 | 1.92 | 4.57 | 2.75 | 3.63 |
| B19 | 4.13 | 3.84 | 5.39 | 3.99 | 4.62 |
| B21 | 6.46 | 3.81 | 3.64 | 4.08 | 5.37 |
| B22 | 1.10 | 4.59 | 3.51 | 4.46 | 1.88 |
| B23 | 6.06 | 4.13 | 4.86 | 6.16 | 5.81 |
| B24 | 5.91 | 3.00 | 2.40 | 3.95 | 4.54 |
| B26 | 5.52 | 5.11 | 3.43 | 6.25 | 4.54 |
| B27 | 6.25 | 5.90 | 5.58 | 6.50 | 6.12 |
| B28 | 8.09 | 4.65 | 4.19 | 5.87 | 6.32 |
| B29 | 3.42 | 2.63 | 4.84 | 2.99 | 4.15 |
| B30 | 8.75 | 5.08 | 5.02 | 6.12 | 6.90 |
| B31 | 6.33 | 3.94 | 3.10 | 5.21 | 5.38 |
| B32 | 8.87 | 6.81 | 5.31 | 8.28 | 6.36 |
| B33 | 4.41 | 3.13 | 5.16 | 4.24 | 4.67 |
| B34 | 5.05 | 3.74 | 5.10 | 4.74 | 4.95 |
| B35 | 4.94 | 3.89 | 5.28 | 4.65 | 5.02 |
| B36 | 4.94 | 4.82 | 5.16 | 4.82 | 5.80 |
| B37 | 7.86 | 4.70 | 3.90 | 6.04 | 6.28 |
| B38 | 5.07 | 2.99 | 5.02 | 4.45 | 4.81 |
| B39 | 5.17 | 4.81 | 5.75 | 5.13 | 5.16 |
| B40 | 3.27 | 3.64 | 2.44 | 3.81 | 2.49 |
| B41 | 7.09 | 3.45 | 6.31 | 5.75 | 6.34 |
| B43 | 4.61 | 4.15 | 2.72 | 4.89 | 2.93 |
| B44 | 5.00 | 3.20 | 5.27 | 4.63 | 4.58 |
| B46 | 5.05 | 2.95 | 2.19 | 3.84 | 4.21 |
| B47 | 8.09 | 4.09 | 4.17 | 5.30 | 6.11 |
| B48 | 5.41 | 2.74 | 2.28 | 3.41 | 4.26 |
| B50 | 4.63 | 4.03 | 2.47 | 5.10 | 2.62 |

Table S3: dRMSD from the X-ray structures calculated for the centroids of the seven most populated clusters. The lowest distance from the X-ray structures registered for each cluster is highlighted in bold.

| dRMSD (Å) |             |             |             |      |             |
|-----------|-------------|-------------|-------------|------|-------------|
| CLUSTERS  | 1ILH.a      | 1ILH.b      | 1ILH.c      | 1NRL | 4J5X        |
| 1         | 5.09        | <b>1.97</b> | 3.68        | 2.42 | 4.92        |
| 2         | 5.62        | 3.88        | <b>2.19</b> | 4.60 | 3.18        |
| 3         | 2.74        | 4.53        | 3.37        | 4.67 | <b>1.85</b> |
| 4         | 3.72        | <b>2.00</b> | 4.77        | 2.22 | 4.55        |
| 5         | 5.22        | 2.66        | <b>2.44</b> | 3.21 | 3.75        |
| 6         | 4.53        | 4.68        | 3.00        | 4.86 | <b>2.92</b> |
| 7         | <b>1.36</b> | 3.96        | 3.61        | 4.08 | 2.11        |

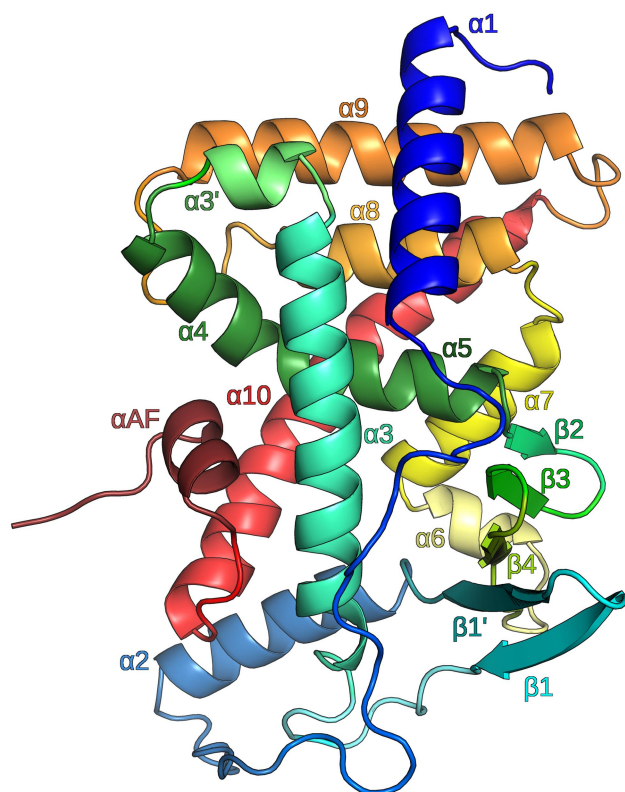

Figure S1: PXR structure in its apo form (PDBID: 4J5W) with secondary structure element names labelled according to the NR LBD nomenclature.<sup>12</sup>

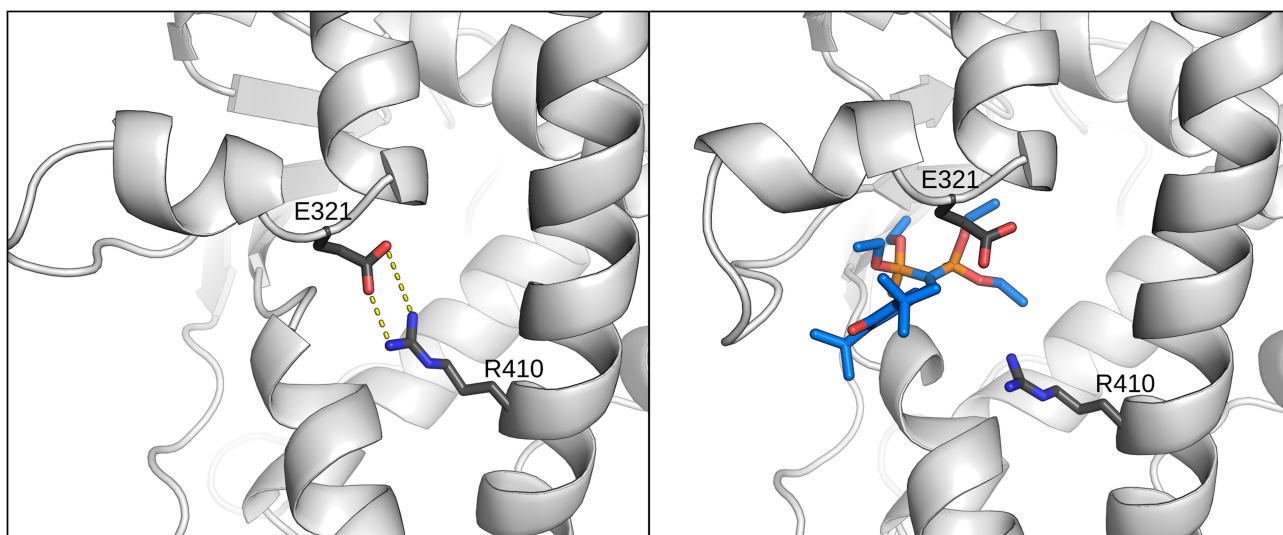

Figure S2: Breaking of the salt-bridge between E321 and R410 upon the ligand entrance. The unperturbed state (left) and a frame captured during the ligand association path (right) are reported. Protein is shown in gray cartoons, sidechains of residues forming the salt-bridge in dark grey sticks and ligand in blue sticks.

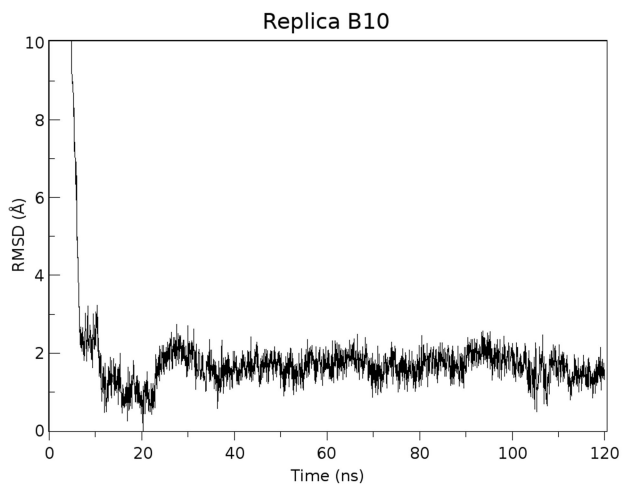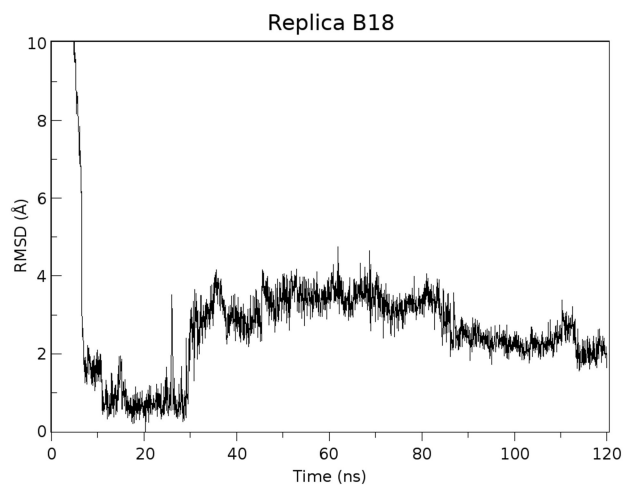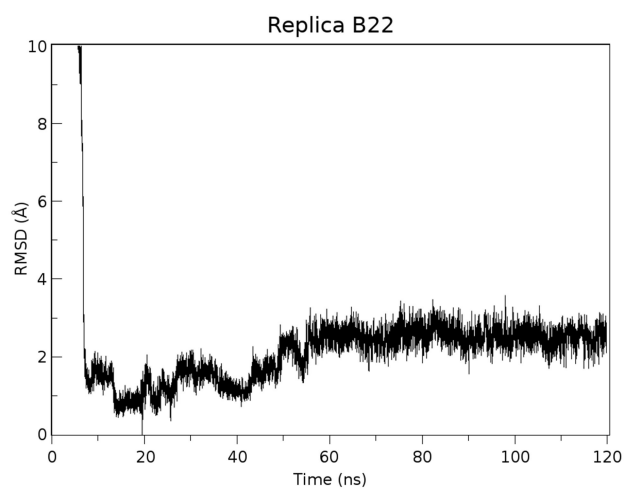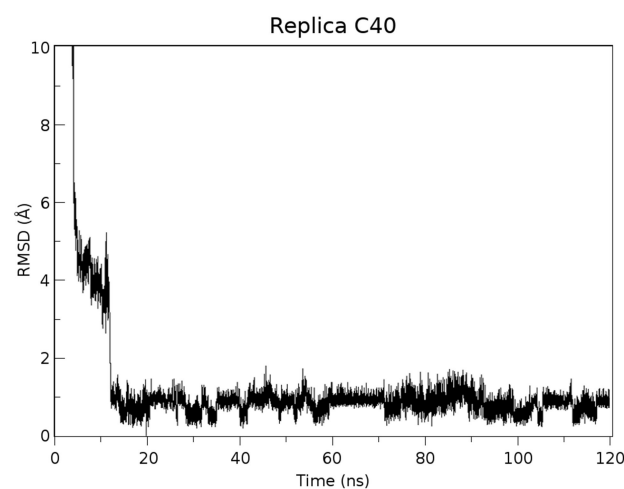

Figure S3: Graphs of the ligand RMSD from the MD-binding poses (calculated on heavy atoms) for MD-Binding simulations (0-20 ns) and plain MD restarts (20-120 ns).

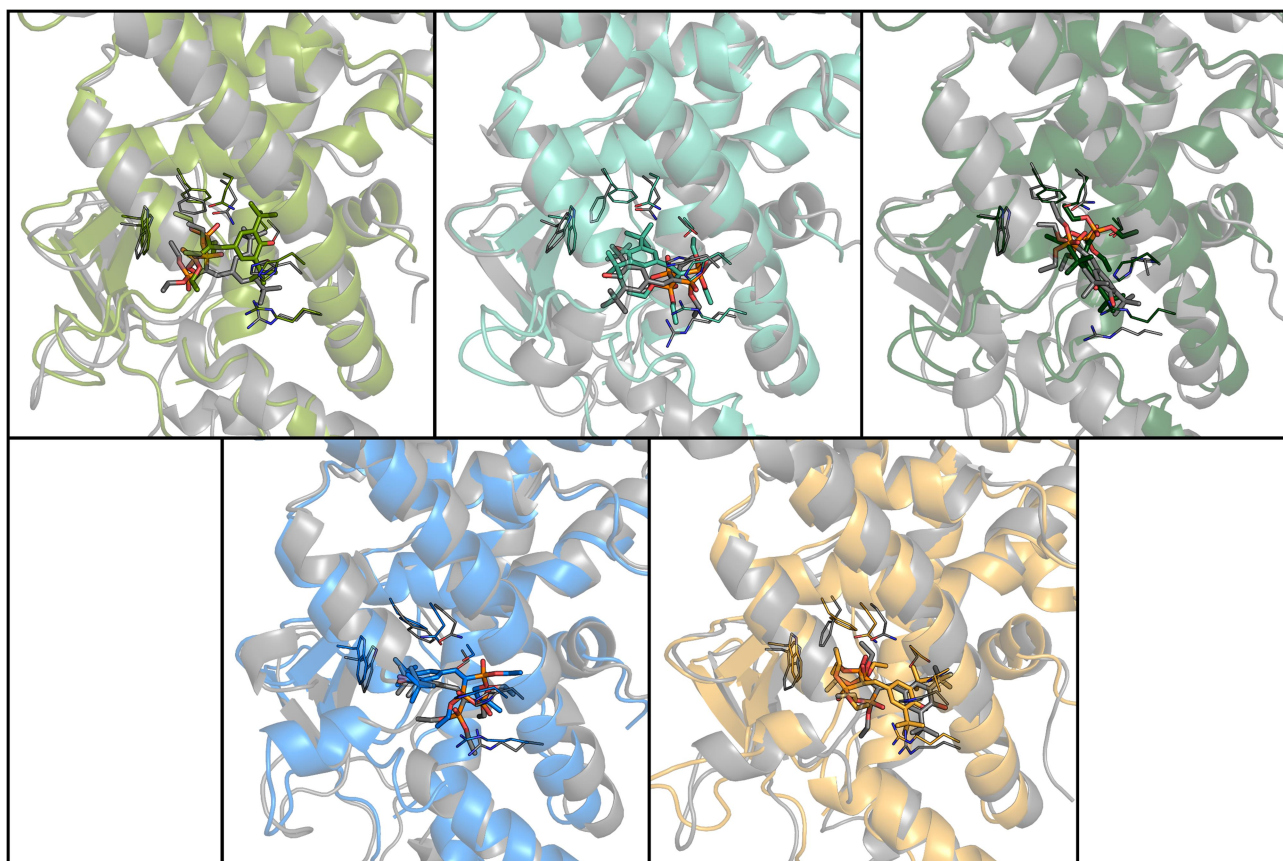

Figure S4: The cluster centroids nearest to the five X-ray structures. Cluster 46 is similar to 1ILH.a (dRMSD = 1.32 Å, light green); cluster 105 is similar to 1ILH.b (dRMSD = 1.42 Å, sea green); cluster 11 is similar to 1ILH.c (dRMSD = 1.52 Å, dark green); cluster 40 is similar to 1NRL (dRMSD = 1.43 Å, blue marine); cluster 41 is similar to 4J5X (dRMSD = 1.22 Å, bright orange).
